CORRECTION

# Correction: Biophysical Analysis of *Anopheles gambiae* Leucine-Rich Repeat Proteins APL1A<sup>1</sup>, APL1B and APL1C and Their Interaction with LRIM1

The PLOS ONE Staff

## Notice of Republication

This article was republished on April 10, 2015, to correct errors in Fig. 1 and Fig. 4 that were introduced during the typesetting process. The title has also been corrected to state “APL1B” rather than “APLB.” Please download this article again to view the correct version. The originally published, uncorrected article and the republished, corrected article are provided here for reference.

## Supporting Information

**S1 File. Originally published, uncorrected article.**  
(PDF)

**S2 File. Republished corrected article.**  
(PDF)

## Reference

1. Williams M, Summers BJ, Baxter RHG (2015) Biophysical Analysis of *Anopheles gambiae* Leucine-Rich Repeat Proteins APL1A<sup>1</sup>, APL1B and APL1C and Their Interaction with LRIM1. PLoS ONE 10(3): e0118911. doi: [10.1371/journal.pone.0118911](https://doi.org/10.1371/journal.pone.0118911) PMID: [25775123](https://pubmed.ncbi.nlm.nih.gov/25775123/)

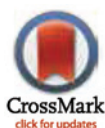

## OPEN ACCESS

**Citation:** The PLOS ONE Staff (2015) Correction: Biophysical Analysis of *Anopheles gambiae* Leucine-Rich Repeat Proteins APL1A<sup>1</sup>, APL1B and APL1C and Their Interaction with LRIM1. PLoS ONE 10(4): e0126901. doi: [10.1371/journal.pone.0126901](https://doi.org/10.1371/journal.pone.0126901)

**Published:** April 20, 2015

**Copyright:** © 2015 The PLOS ONE Staff. This is an open access article distributed under the terms of the [Creative Commons Attribution License](https://creativecommons.org/licenses/by/4.0/), which permits unrestricted use, distribution, and reproduction in any medium, provided the original author and source are credited.
